# Supplementary material for: Genetic and Environmental Influences on Fetal Growth Vary during Sensitive Periods in Pregnancy
Source: PubMed Central journal article supplement (PMC5940684; doi:10.1038/s41598-018-25706-z), 2018-05-08
Supplement: 41598_2018_25706_MOESM1_ESM.pdf [file 41598_2018_25706_MOESM1_ESM.pdf]

## Supplementary Information

### Genetic and Environmental Influences on Fetal Growth Vary during Sensitive Periods in Pregnancy

Tsegaslassie Workalemahu<sup>1</sup>, Katherine L. Grantz<sup>1</sup>, Jagteshwar Grewal<sup>1</sup>, Cuilin Zhang<sup>1</sup>,  
Germaine M. Buck Louis<sup>1</sup>, Fasil Tekola-Ayele<sup>1\*</sup>

<sup>1</sup>Epidemiology Branch, Division of Intramural Population Health Research, *Eunice Kennedy Shriver* National Institute of Child Health and Human Development, National Institutes of Health, Bethesda, MD, USA

#### *Correspondence:*

\*Fasil Tekola-Ayele, PhD

Epidemiology Branch, Division of Intramural Population Health Research,  
Eunice Kennedy Shriver National Institute of Child Health and Human Development  
National Institutes of Health

6710B Rockledge Drive, Room 3204

Bethesda, MD 20892-7004

E-mail: ayeleft@mail.nih.gov

Tel: 301-827-6518

| <b>Fetal growth measures</b>                 | <b>Variance component (%)</b> | <b>P-value*</b> | <b>Standard error</b> |
|----------------------------------------------|-------------------------------|-----------------|-----------------------|
| Estimated fetal weight (13 weeks gestation)  |                               |                 |                       |
| h <sup>2</sup>                               | 16.5                          | 0.24            | 0.21                  |
| c <sup>2</sup>                               | 53.7                          | <b>5.40E-05</b> | 0.13                  |
| e <sup>2</sup>                               | 29.8                          |                 | 0.10                  |
| Estimated fetal weight (20 weeks gestation)  |                               |                 |                       |
| h <sup>2</sup>                               | 40.8                          | <b>0.03</b>     | 0.17                  |
| c <sup>2</sup>                               | 38.9                          | <b>0.002</b>    | 0.12                  |
| e <sup>2</sup>                               | 20.3                          |                 | 0.07                  |
| Estimated fetal weight (27 weeks gestation)  |                               |                 |                       |
| h <sup>2</sup>                               | 71.3                          | <b>0.002</b>    | 0.17                  |
| c <sup>2</sup>                               | 11.0                          | 0.22            | 0.14                  |
| e <sup>2</sup>                               | 17.7                          |                 | 0.06                  |
| Estimated fetal weight (38 weeks gestation)  |                               |                 |                       |
| h <sup>2</sup>                               | 65.8                          | <b>0.02</b>     | 0.22                  |
| c <sup>2</sup>                               | 7.3                           | 0.32            | 0.16                  |
| e <sup>2</sup>                               | 28.0                          |                 | 0.09                  |
| Abdominal circumference (13 weeks gestation) |                               |                 |                       |
| h <sup>2</sup>                               | 12.8                          | 0.33            | 0.26                  |
| c <sup>2</sup>                               | 49.6                          | <b>0.0006</b>   | 0.16                  |
| e <sup>2</sup>                               | 38.5                          |                 | 0.12                  |
| Abdominal circumference (20 weeks gestation) |                               |                 |                       |
| h <sup>2</sup>                               | 22.9                          | 0.19            | 0.22                  |
| c <sup>2</sup>                               | 47.1                          | <b>0.0004</b>   | 0.14                  |
| e <sup>2</sup>                               | 30.0                          |                 | 0.10                  |
| Abdominal circumference (27 weeks gestation) |                               |                 |                       |
| h <sup>2</sup>                               | 53.3                          | <b>0.03</b>     | 0.22                  |
| c <sup>2</sup>                               | 19.0                          | 0.11            | 0.15                  |
| e <sup>2</sup>                               | 27.7                          |                 | 0.09                  |
| Abdominal circumference (38 weeks gestation) |                               |                 |                       |
| h <sup>2</sup>                               | 45.2                          | 0.06            | 0.23                  |
| c <sup>2</sup>                               | 25.8                          | 0.05            | 0.15                  |
| e <sup>2</sup>                               | 30.0                          |                 | 0.10                  |
| Femur length (13 weeks gestation)            |                               |                 |                       |
| h <sup>2</sup>                               | 29.0                          | 0.10            | 0.18                  |
| c <sup>2</sup>                               | 47.2                          | <b>1.00E-04</b> | 0.12                  |
| e <sup>2</sup>                               | 23.5                          |                 | 0.08                  |
| Femur length (20 weeks gestation)            |                               |                 |                       |
| h <sup>2</sup>                               | 30.3                          | 0.10            | 0.19                  |
| c <sup>2</sup>                               | 44.8                          | <b>4.00E-04</b> | 0.13                  |
| e <sup>2</sup>                               | 24.8                          |                 | 0.09                  |
| Femur length (27 weeks gestation)            |                               |                 |                       |
| h <sup>2</sup>                               | 71.8                          | <b>6.07E-09</b> | 0.09                  |
| c <sup>2</sup>                               | 0.0                           | NA              | NA                    |
| e <sup>2</sup>                               | 28.1                          |                 | 0.09                  |

|                                     |      |                 |      |
|-------------------------------------|------|-----------------|------|
| Femur length (38 weeks gestation)   |      |                 |      |
| h <sup>2</sup>                      | 38.7 | 0.13            | 0.30 |
| c <sup>2</sup>                      | 16.9 | 0.20            | 0.19 |
| e <sup>2</sup>                      | 45.4 |                 | 0.13 |
| Humerus length (13 weeks gestation) |      |                 |      |
| h <sup>2</sup>                      | 20.9 | 0.17            | 0.19 |
| c <sup>2</sup>                      | 53.8 | <b>1.00E-05</b> | 0.12 |
| e <sup>2</sup>                      | 25.2 |                 | 0.09 |
| Humerus length (20 weeks gestation) |      |                 |      |
| h <sup>2</sup>                      | 21.7 | 0.16            | 0.18 |
| c <sup>2</sup>                      | 54.2 | <b>9.00E-06</b> | 0.12 |
| e <sup>2</sup>                      | 24.1 |                 | 0.08 |
| Humerus length (27 weeks gestation) |      |                 |      |
| h <sup>2</sup>                      | 57.3 | <b>0.01</b>     | 0.19 |
| c <sup>2</sup>                      | 20.1 | 8.31E-02        | 0.14 |
| e <sup>2</sup>                      | 22.6 |                 | 0.08 |
| Humerus length (38 weeks gestation) |      |                 |      |
| h <sup>2</sup>                      | 56.0 | <b>0.02</b>     | 0.21 |
| c <sup>2</sup>                      | 17.7 | 0.12            | 0.15 |
| e <sup>2</sup>                      | 26.3 |                 | 0.09 |

**Table S1. Genetic heritability (h<sup>2</sup>), shared (c<sup>2</sup>) and unique (e<sup>2</sup>) environmental variance estimates and their trajectories across gestation.** Models adjusted for maternal age, pre-pregnancy BMI, smoking, alcohol use, race, parity, gravidity, employment status, educational status, and fetal sex as covariates.

\*In bold are P-values <0.05.

|                                |                     | <b>End of first trimester</b> | <b>Mid-gestation</b> | <b>End of second trimester</b> | <b>38th week</b> |
|--------------------------------|---------------------|-------------------------------|----------------------|--------------------------------|------------------|
| <b>Estimated fetal weight</b>  | Age                 | p-value=0.0005                | p-value=0.0005       | p-value=0.002                  | -                |
|                                | Sex                 | p-value=0.0009                | p-value=0.0002       | p-value=0.003                  | -                |
|                                | Race                | p-value=0.03                  | p-value=0.02         | p-value=0.03                   | -                |
|                                | Variance explained* | 10.1%                         | 11.1%                | 8.4%                           | -                |
| <b>Abdominal circumference</b> | Age                 | p-value=0.03                  | p-value=0.02         | p-value=0.02                   | -                |
|                                | Sex                 | p-value=0.02                  | p-value=0.04         | p-value=0.04                   | -                |
|                                | Parity              | p-value=0.01                  | p-value=0.04         | p-value=0.04                   | -                |
|                                | Variance explained* | 9.6%                          | 10.9%                | 7.7%                           | -                |
| <b>Humerus length</b>          | Age                 | p-value=0.009                 | p-value=0.01         | p-value=0.002                  | -                |
|                                | Sex                 | p-value=0.008                 | p-value=0.002        | -                              | p-value=0.007    |
|                                | Race                | p-value=0.02                  | p-value=0.01         | p-value=0.003                  | p-value=0.02     |
|                                | Variance explained* | 6.1%                          | 7.5%                 | 10.3%                          | 9.8%             |
| <b>Femur length</b>            | Age                 | p-value=0.007                 | p-value=0.003        | p-value=0.02                   | p-value=0.02     |
|                                | Sex                 | p-value=0.02                  | p-value=0.01         | -                              | -                |
|                                | Race                | p-value=0.04                  | p-value=0.01         | p-value=0.0004                 | p-value=0.003    |
|                                | Variance explained* | 6.6%                          | 8.3%                 | 8.2%                           | 5.0%             |

**Table S2. Covariates that significantly explained fetal growth variations.** Models adjusted for maternal age, pre-pregnancy BMI, smoking, alcohol use, race, parity, gravidity, employment status, educational status, and fetal sex as covariates.

\*Variance explained by co-variates in the final model.
